# Supplementary material for: Metabolic Dysfunction-Associated Steatotic Liver Disease in a Dish: Human Precision-Cut Liver Slices as a Platform for Drug Screening and Interventions
Source: MDPI journal article supplement (doi:10.3390/nu16050626), 2024-02-23
Supplement: s1 [file s1]

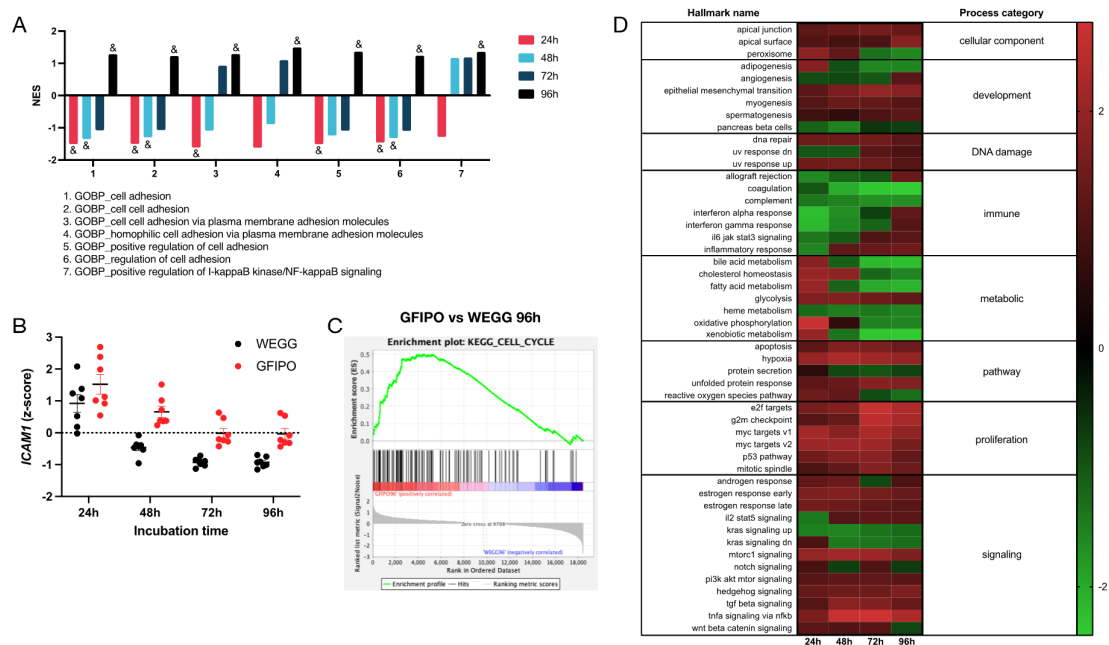

**Figure S2: Altered biological processes or pathways and ICAM1 gene expression in PCLs.**  
**A** Altered GO biological processes by GFIPO compared to WEGG at each time point (& indicates significantly changed compared to the corresponding WEGG, which was calculated by GSEA). **B** Gene expression of *ICAM1* displayed in z-score by NGS. **C** GSEA plot showing the up-regulated KEGG pathway cell cycle at 96 h by GFIPO compared to WEGG. **D** Heatmap of all altered hallmark pathways by GFIPO compared to WEGG (red: up-regulated; green: down-regulated).
