# Supplementary material for: Metabolic Dysfunction-Associated Steatotic Liver Disease in a Dish: Human Precision-Cut Liver Slices as a Platform for Drug Screening and Interventions
Source: MDPI journal article supplement (doi:10.3390/nu16050626), 2024-02-23
Supplement: s1 [file s1]

**Table S1:** List of SYBR Green primers used for RT-qPCR

| <b>Primers</b> | <b>Forward sequence (5'-3')</b> | <b>Reverse sequence (5'-3')</b> |
|----------------|---------------------------------|---------------------------------|
| <i>TNF</i>     | GAGGCCAAGCCCTGGTATG             | CGGGCCGATTGATCTCAGC             |
| <i>IL6</i>     | ACTCACCTCTTCAGAACGAATTG         | CCATCTTTGGAAGGTTTCAGGTTG        |
| <i>IL18</i>    | TACCTGTCCTGCGTGTTGAA            | TCTTTGGGTAATTTTGGGATCT          |
| <i>COL1A1</i>  | CAATCACCTGCGTACAGAACGCC         | CGGCAGGGCTCGGGTTTC              |
| <i>ACTA2</i>   | AAAAGACAGCTACGTGGGTGA           | GCCATGTTCTATCGGGTACTTC          |
| <i>MKI67</i>   | CTCAGCACCTGCTTGTGTTGG           | TTGCCTCCTGCTCATGGATT            |
